# Supplementary material for: People underestimate the errors made by algorithms for credit scoring and recidivism prediction but accept even fewer errors
Source: Springer Nature journal article supplement (doi:10.1038/s41598-021-99802-y), 2021-10-11
Supplement: MOESM1 [file 41598_2021_99802_MOESM1_ESM.pdf]

Rebitschek, Felix G.; Gigerenzer, Gerd; Wagner, Gert G.

**Article — Published Version**

## People underestimate the errors made by algorithms for credit scoring and recidivism prediction but accept even fewer errors

Scientific Reports

**Provided in Cooperation with:**

German Institute for Economic Research (DIW Berlin)

*Suggested Citation:* Rebitschek, Felix G.; Gigerenzer, Gerd; Wagner, Gert G. (2021) : People underestimate the errors made by algorithms for credit scoring and recidivism prediction but accept even fewer errors, *Scientific Reports*, ISSN 2045-2322, Springer, Berlin, Vol. 11, pp. 1-11, <https://doi.org/10.1038/s41598-021-99802-y>, <https://www.nature.com/articles/s41598-021-99802-y#article-info>

This Version is available at:

<https://hdl.handle.net/10419/250060>

**Standard-Nutzungsbedingungen:**

Die Dokumente auf EconStor dürfen zu eigenen wissenschaftlichen Zwecken und zum Privatgebrauch gespeichert und kopiert werden.

Sie dürfen die Dokumente nicht für öffentliche oder kommerzielle Zwecke vervielfältigen, öffentlich ausstellen, öffentlich zugänglich machen, vertreiben oder anderweitig nutzen.

Sofern die Verfasser die Dokumente unter Open-Content-Lizenzen (insbesondere CC-Lizenzen) zur Verfügung gestellt haben sollten, gelten abweichend von diesen Nutzungsbedingungen die in der dort genannten Lizenz gewährten Nutzungsrechte.

**Terms of use:**

*Documents in EconStor may be saved and copied for your personal and scholarly purposes.*

*You are not to copy documents for public or commercial purposes, to exhibit the documents publicly, to make them publicly available on the internet, or to distribute or otherwise use the documents in public.*

*If the documents have been made available under an Open Content Licence (especially Creative Commons Licences), you may exercise further usage rights as specified in the indicated licence.*

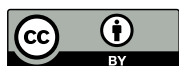

<https://creativecommons.org/licenses/by/4.0>

## **Supplementary Information for**

People underestimate the errors made by algorithms for credit scoring and recidivism prediction but accept even fewer errors

Felix G. Rebitschek<sup>a,b,1</sup>

Gerd Gigerenzer<sup>a, b</sup>

Gert G. Wagner<sup>a,b,c</sup>

<sup>a</sup>Harding Center for Risk Literacy, Faculty of Health Sciences Brandenburg, University of Potsdam, Potsdam

<sup>b</sup>Max Planck Institute for Human Development, Berlin

<sup>c</sup>German Socio-Economic Panel Study (SOEP), Berlin

<sup>1</sup>Felix G. Rebitschek, **Email:** [rebitschek@mpib-berlin.mpg.de](mailto:rebitschek@mpib-berlin.mpg.de)

### **This PDF file includes:**

Figures S1a-d to S3

Tables S1 to S8

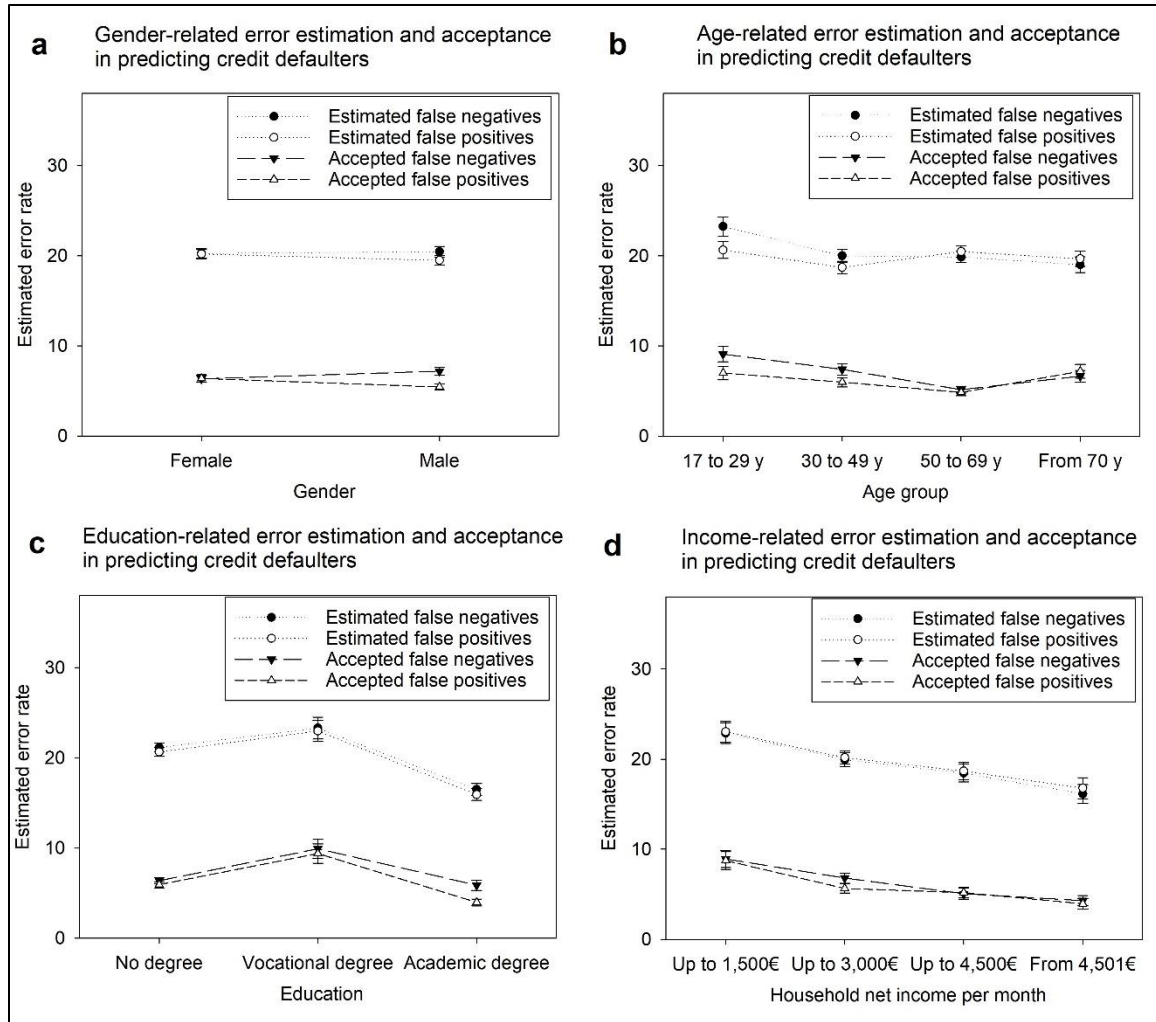

Figures S1a-d: Relationships between sample characteristics and error estimations and acceptance in predicting credit defaulting. Error bars show the standard error of the mean.

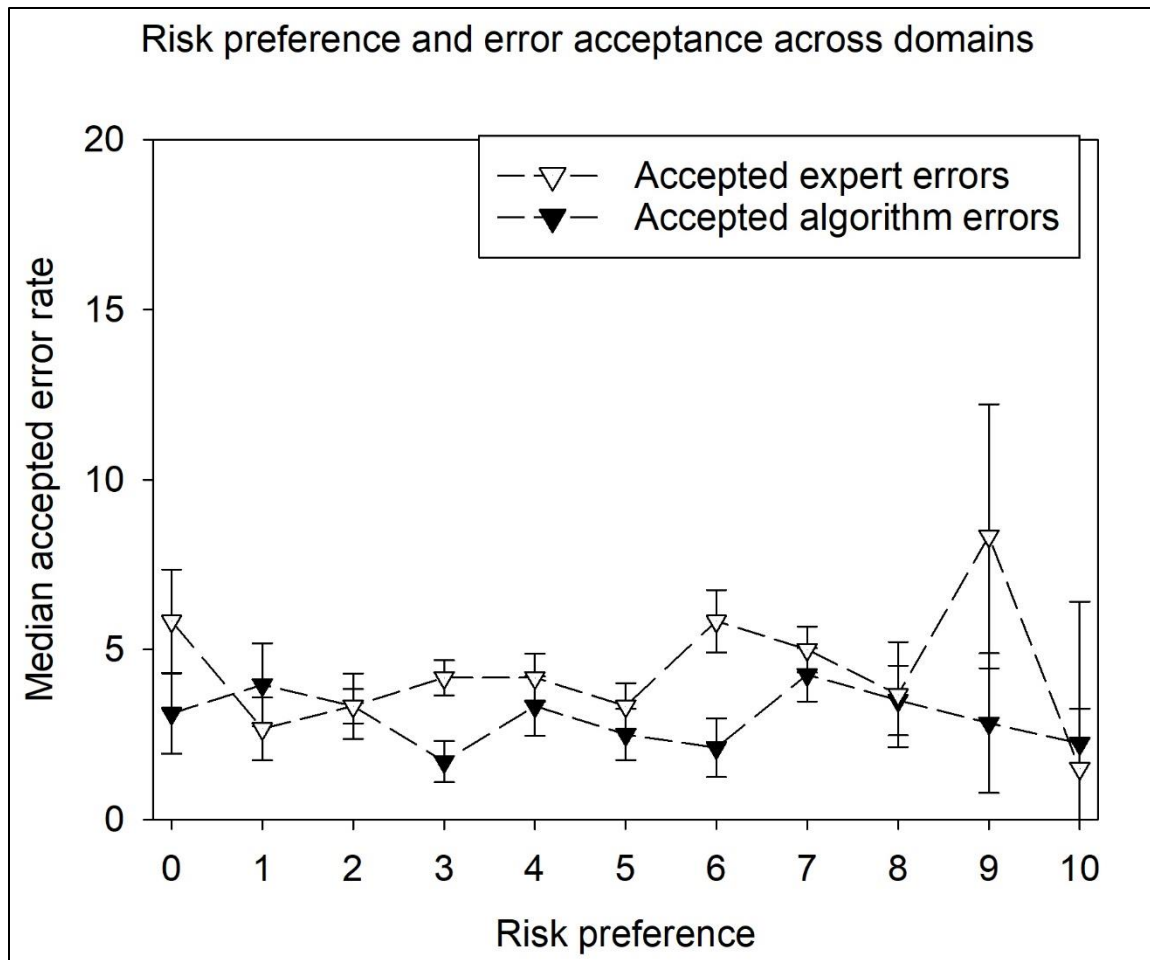

Figure S2. Median acceptance of algorithm and expert errors depending on risk preference.

Sample is weighted. Error bars show the standard error of the mean.

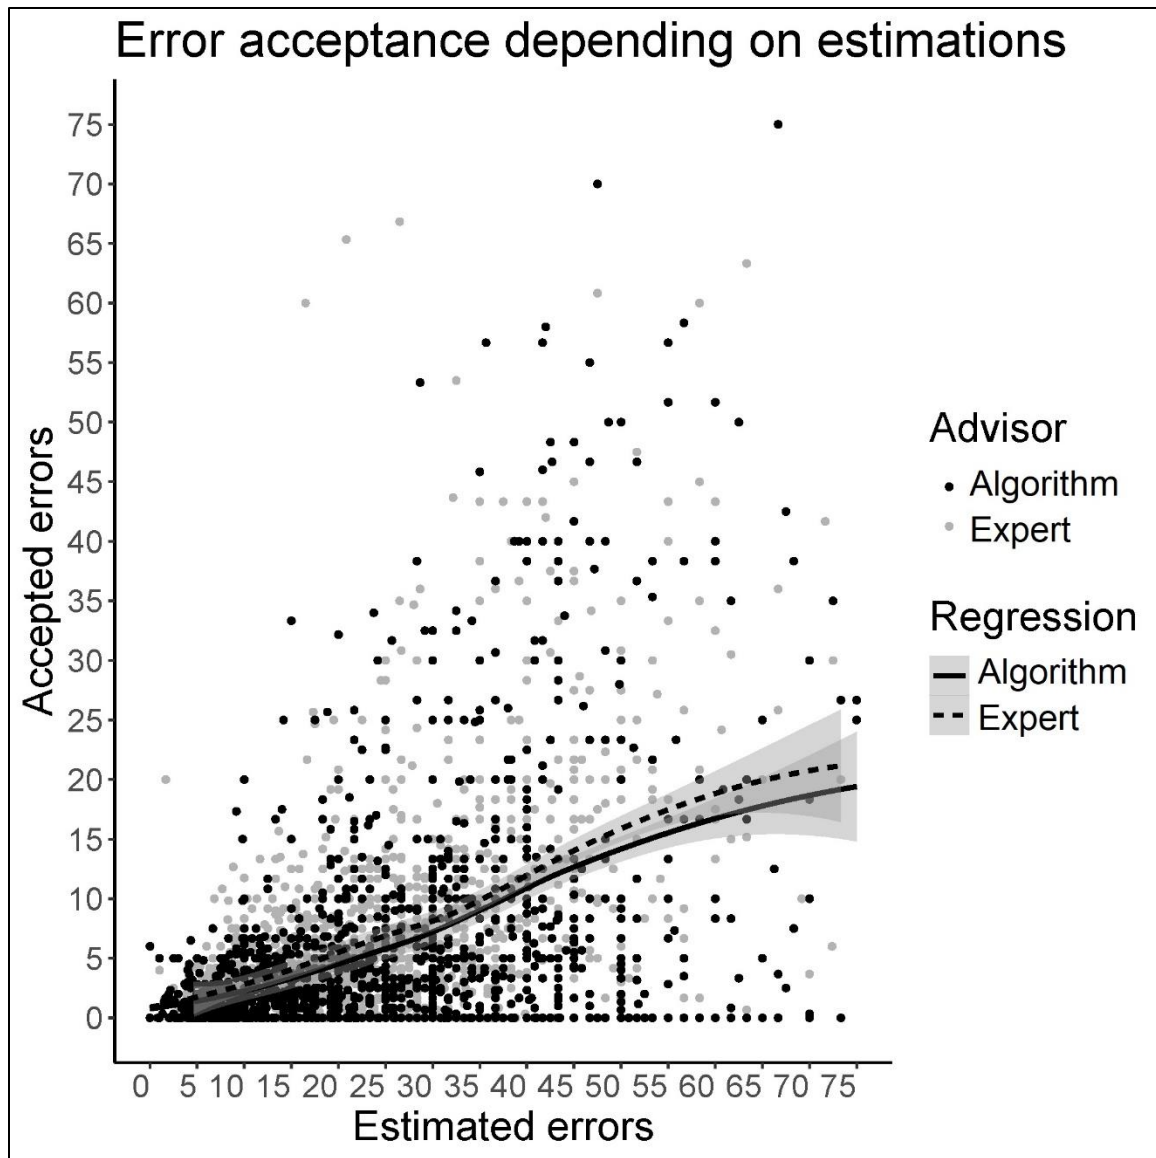

Figure S3: The scatterplot shows each respondent's estimates and acceptance of errors. Each point corresponds to one respondent (gray for expert condition, black for the algorithm condition). The lines show local regressions. The gray shadings show the standard error of the mean.

Table S1. Percentage of respondents who assessed the corresponding system to be error-free in terms of predictions (illusion of certainty).

|                                                       | <b>Algorithms</b> |                | <b>Experts</b> |                |
|-------------------------------------------------------|-------------------|----------------|----------------|----------------|
|                                                       | N                 | Error-free [%] | N              | Error-free [%] |
| Mistakenly suitable applicant (false positive)        | 1,380             | 2.9%           | 1,318          | 3.6%           |
| Mistakenly unsuitable applicant (false negative)      | 1,374             | 3.1%           | 1,324          | 1.5%           |
| Mistakenly not at risk of recidivism (false negative) | 1,361             | 2.6%           | 1,291          | 1.6%           |
| Mistakenly at risk of recidivism (false positive)     | 1,348             | 2.1%           | 1,275          | 1.7%           |
| Mistakenly behaving healthily (false positive)        | 1,333             | 4.7%           | 1,298          | 3.2%           |
| Mistakenly behaving unhealthily (false negative)      | 1,343             | 4.6%           | 1,299          | 4.3%           |
| Mistakenly not creditworthy (false positive)          | 2,733             | 4.0%           |                |                |
| Mistakenly creditworthy (false negative)              | 2,728             | 5.9%           |                |                |

Table S2. Distribution of characteristics according to estimation (respondents grouped by five percent of scale value around the ground truth) and acceptance of credit scoring errors (presented as accuracy; grouped around AUC = .90, distinguishing highly critical respondents and less critical respondents along a lay-comprehensible border [1 error per 10 assignments]).

| Credit defaulting prediction                                  |                                | Underest.<br>accuracy<br>AUC<.76<br>n=850 | Correctly est.<br>accuracy<br>AUC=.81±.05<br>n=552 | Overest.<br>accuracy<br>AUC>.86<br>n=1,172 | $p^1$ | Accepting<br>AUC<.90<br>n=364 | Accepting<br>AUC≥.90<br>n=2,229 | $p^1$ |
|---------------------------------------------------------------|--------------------------------|-------------------------------------------|----------------------------------------------------|--------------------------------------------|-------|-------------------------------|---------------------------------|-------|
| Characteristic                                                |                                |                                           |                                                    |                                            |       |                               |                                 |       |
| Gender [%]                                                    | Female                         | 52.6                                      | 52.3                                               | 51.7                                       | .920  | 53.1                          | 52.2                            | .821  |
|                                                               | Male                           | 47.4                                      | 47.7                                               | 48.3                                       |       | 46.9                          | 47.8                            |       |
| Age [M (SD)] in years                                         |                                | 49.2 (18.2)                               | 50.5 (18.5)                                        | 50.1 (17.9)                                | .403  | 47.9 (19.1)                   | 50.2 (17.9)                     | .025  |
| Household net income [M (SD)] in EUR                          |                                | 2,653 (1,922)                             | 3,171 (1,814)                                      | 3,090 (1,890)                              | <.001 | 2,462 (1,647)                 | 3,044 (1,919)                   | <.001 |
| Education Diplomas/degrees from secondary/tertiary school [%] | Sec. Gen. School Leaving Cert. | 30.0                                      | 20.2                                               | 17.7                                       | <.001 | 30.9                          | 20.5                            | <.001 |
|                                                               | Intermediate School Degree     | 31.1                                      | 31.5                                               | 29.7                                       |       | 32.6                          | 30.4                            |       |
|                                                               | Leaving Cert. From Voc. HS     | 6.6                                       | 6.5                                                | 8.5                                        |       | 4.6                           | 7.9                             |       |
|                                                               | College Entrance Exam          | 19.6                                      | 30.0                                               | 31.7                                       |       | 15.3                          | 29.3                            |       |
|                                                               | Other                          | 7.7                                       | 9.6                                                | 10.3                                       |       | 7.6                           | 9.8                             |       |
|                                                               | Dropout, No School Certificate | 3.6                                       | 0.9                                                | 1.3                                        |       | 6.5                           | 1.3                             |       |
|                                                               | Currently In School            | 1.3                                       | 1.4                                                | .8                                         |       | 2.5                           | 0.9                             |       |
| Vocational degree attained [%]                                | Apprenticeship                 | 40.4                                      | 43.4                                               | 40.3                                       | .014  | 37.6                          | 41.7                            | .084  |
|                                                               | Vocational School              | 9.0                                       | 9.9                                                | 9.4                                        |       | 8.6                           | 9.4                             |       |
|                                                               | Health Care School             | 0.0                                       | 0.1                                                | 0.1                                        |       | 0.1                           | 0.1                             |       |
|                                                               | Technical School               | 7.5                                       | 5.4                                                | 4.1                                        |       | 5.8                           | 5.5                             |       |
|                                                               | Civil Servant Training         | 1.5                                       | 3.0                                                | 2.4                                        |       | 1.0                           | 2.3                             |       |
|                                                               | Other Degree                   | 1.3                                       | 0.2                                                | 1.9                                        |       | 1.7                           | 1.4                             |       |
|                                                               | Completed Voc. Training/Edu.   | 3.5                                       | 2.4                                                | 3.2                                        |       | 5.4                           | 2.8                             |       |
| Completed college education [%]                               | NA (e.g. college degree)       | 36.8                                      | 35.6                                               | 38.6                                       | <.001 | 39.8                          | 36.9                            | .002  |
|                                                               | FH (Univ. of Applied Sciences) | 4.3                                       | 6.9                                                | 7.9                                        |       | 5.9                           | 7.2                             |       |
|                                                               | University, Technical College  | 7.9                                       | 10.5                                               | 13.9                                       |       | 6.6                           | 11.9                            |       |
|                                                               | College Not In Germany         | 0.1                                       | 0.0                                                | 0.2                                        |       | 0.0                           | 0.1                             |       |
|                                                               | Engineering, Technical School  | 0.9                                       | 1.8                                                | 1.4                                        |       | 0.2                           | 1.6                             |       |
|                                                               | University (East)              | 2.0                                       | 0.7                                                | 1.8                                        |       | 0.7                           | 1.8                             |       |
|                                                               | Graduation, state doctorate    | 2.7                                       | 2.2                                                | 3.7                                        |       | 1.7                           | 2.9                             |       |
| Not applicable                                                |                                | 82.1                                      | 77.8                                               | 71.0                                       |       | 84.9                          | 74.5                            |       |

|                                                                |                            |             |            |            |       |             |            |       |
|----------------------------------------------------------------|----------------------------|-------------|------------|------------|-------|-------------|------------|-------|
| Occupation status [%]                                          | Full time employment       | 35.3        | 40.4       | 40.5       | <.001 | 28.2        | 40.4       | <.001 |
|                                                                | Part-time employment       | 11.3        | 14.4       | 15.4       |       | 11.8        | 14.1       |       |
|                                                                | Training/apprenticeship    | 3.1         | 2.7        | 1.7        |       | 4.0         | 2.0        |       |
|                                                                | Marginally employed        | 4.8         | 6.7        | 5.8        |       | 6.0         | 5.6        |       |
|                                                                | Partial retirement         | 0.0         | 0.4        | 0.1        |       | 0.0         | 0.0        |       |
|                                                                | Voluntary service          | 0.2         | 0.0        | 0.0        |       | 0.5         | 0.0        |       |
|                                                                | Workshop for the disabled  | 0.4         | 0.0        | 0.1        |       | 0.0         | 0.1        |       |
|                                                                | Not employed (anymore)     | 45.0        | 35.4       | 36.3       |       | 49.5        | 37.6       |       |
| Unemployment phases in the past ten years [%] <sup>2</sup>     | Yes                        | 31.5        | 22.0       | 24.0       | .001  | 35.1        | 25.0       | .001  |
|                                                                | No                         | 68.5        | 78.0       | 76.0       |       | 64.9        | 75.0       |       |
| Body Mass Index (BMI) [M (SD)]                                 |                            | 27.1 (10.4) | 26.4 (7.5) | 25.9 (4.8) | .005  | 27.7 (16.4) | 26.2 (4.9) | .001  |
| Self-reported health state [%] <sup>2</sup>                    | Very good                  | 10,4        | 14,0       | 12,8       | <.001 | 10,9        | 12,5       | .001  |
|                                                                | Good                       | 35,9        | 40,2       | 45,1       |       | 32,7        | 42,4       |       |
|                                                                | Satisfactory               | 35,8        | 30,8       | 29,4       |       | 40,8        | 30,3       |       |
|                                                                | Not so good                | 14,1        | 12,8       | 10,5       |       | 13,1        | 12,0       |       |
|                                                                | Poor                       | 3,8         | 2,1        | 2,2        |       | 2,5         | 2,9        |       |
| Health insurance status [%] <sup>2</sup>                       | Statutory health insurance | 90.5        | 88.5       | 84.7       | <.001 | 94.7        | 86.5       | <.001 |
|                                                                | Private health insurance   | 9.5         | 11.5       | 15.3       |       | 5.3         | 13.5       |       |
| Risk preference [M (SD)] from 0 (avoidance) to 10 (preference) |                            | 4.6 (2.5)   | 4.2 (2.2.) | 4.5 (2.4)  | .014  | 4.5 (2.6)   | 4.4 (2.3)  | .540  |

1 Variance analyses and Chi<sup>2</sup>-tests, respectively

2 Subsamples were presented with the items



Table S3. Distribution of characteristics according to estimation (respondents grouped by five percent of scale value around the ground truth) and acceptance of algorithm errors in recidivism prediction (presented as accuracy; grouped around AUC = .90, distinguishing highly critical respondents and less critical respondents along a lay-comprehensible border [1 error per 10 assignments]).

| Recidivism prediction                                         |                                | Underest.<br>accuracy<br>AUC<.63<br>n=314 | Correctly est.<br>accuracy<br>AUC=.68±.05<br>n=178 | Overest.<br>accuracy<br>AUC>.73<br>n=770 | $p^1$ | Accepting<br>AUC<.90<br>n=155 | Accepting<br>AUC≥.90<br>n=1,130 | $p^1$ |
|---------------------------------------------------------------|--------------------------------|-------------------------------------------|----------------------------------------------------|------------------------------------------|-------|-------------------------------|---------------------------------|-------|
| Characteristic                                                |                                |                                           |                                                    |                                          |       |                               |                                 |       |
| Gender [%]                                                    | Female                         | 49.3                                      | 52.6                                               | 52.0                                     | .704  | 44.7                          | 52.2                            | .086  |
|                                                               | Male                           | 50.7                                      | 47.4                                               | 48.0                                     |       | 55.3                          | 47.8                            |       |
| Age [M (SD)] in years                                         |                                | 49.5 (18.3)                               | 53.2 (18.6)                                        | 47.7 (18.0)                              | .001  | 48.5 (19.6)                   | 49.1 (18.2)                     | .713  |
| Household net income [M (SD)] in EUR                          |                                | 2,667 (1,793)                             | 2,992 (1,583)                                      | 3,136 (1,850)                            | .012  | 2,338 (1,390)                 | 3,098 (1,846)                   | <.001 |
| Education Diplomas/degrees from secondary/tertiary school [%] | Sec. Gen. School Leaving Cert. | 25.0                                      | 28.6                                               | 17.1                                     | <.001 | 27.8                          | 20.0                            | <.001 |
|                                                               | Intermediate School Degree     | 38.9                                      | 23.3                                               | 27.0                                     |       | 22.1                          | 30.2                            |       |
|                                                               | Leaving Cert. From Voc. HS     | 6.0                                       | 8.3                                                | 8.2                                      |       | 8.6                           | 7.5                             |       |
|                                                               | College Entrance Exam          | 16.8                                      | 26.3                                               | 33.2                                     |       | 17.5                          | 29.8                            |       |
|                                                               | Other                          | 9.7                                       | 13.0                                               | 10.4                                     |       | 13.8                          | 9.9                             |       |
|                                                               | Dropout, No School Certificate | 2.2                                       | 0.2                                                | 2.2                                      |       | 7.7                           | 1.2                             |       |
|                                                               | Currently In School            | 1.4                                       | 0.4                                                | 1.9                                      |       | 2.7                           | 1.4                             |       |
| Vocational degree attained [%]                                | Apprenticeship                 | 44.0                                      | 40.1                                               | 37.1                                     | .012  | 30.7                          | 40.3                            | .005  |
|                                                               | Vocational School              | 8.9                                       | 10.9                                               | 7.9                                      |       | 7.1                           | 8.7                             |       |
|                                                               | Health Care School             | 0.0                                       | 0.0                                                | 0.0                                      |       | 0.0                           | 0.0                             |       |
|                                                               | Technical School               | 4.6                                       | 4.5                                                | 4.6                                      |       | 6.0                           | 4.9                             |       |
|                                                               | Civil Servant Training         | 1.5                                       | 2.2                                                | 2.5                                      |       | 1.9                           | 2.2                             |       |
|                                                               | Other Degree                   | 0.1                                       | 3.2                                                | 1.8                                      |       | 0.9                           | 1.6                             |       |
|                                                               | Completed Voc. Training/Edu.   | 7.0                                       | 2.8                                                | 3.3                                      |       | 9.7                           | 3.4                             |       |
| Completed college education [%]                               | NA (e.g. college degree)       | 33.9                                      | 36.3                                               | 42.9                                     |       | 43.7                          | 38.9                            |       |
|                                                               | FH (Univ. of Applied Sciences) | 4.8                                       | 2.2                                                | 9.1                                      | <.001 | 9.5                           | 6.6                             | .102  |
|                                                               | University, Technical College  | 10.0                                      | 6.5                                                | 13.1                                     |       | 13.9                          | 11.4                            |       |
|                                                               | College Not In Germany         | 0.1                                       | 0.9                                                | 0.0                                      |       | 0.0                           | 0.2                             |       |
|                                                               | Engineering, Technical School  | 0.8                                       | 1.6                                                | 1.7                                      |       | 0.0                           | 1.6                             |       |
|                                                               | University (East)              | 0.4                                       | 2.2                                                | 2.2                                      |       | 0.8                           | 1.9                             |       |
|                                                               | Graduation, state doctorate    | 0.9                                       | 5.8                                                | 3.9                                      |       | 0.5                           | 3.8                             |       |
| Not applicable                                                |                                | 83.1                                      | 80.9                                               | 70.0                                     |       | 75.3                          | 74.5                            |       |

|                                                                |                            |            |            |            |       |            |            |       |
|----------------------------------------------------------------|----------------------------|------------|------------|------------|-------|------------|------------|-------|
| Occupation status [%]                                          | Full time employment       | 38.7       | 29.2       | 44.1       | <.001 | 34.0       | 41.1       | <.001 |
|                                                                | Part-time employment       | 9.3        | 18.8       | 12.0       |       | 9.3        | 13.2       |       |
|                                                                | Training/apprenticeship    | 4.4        | 1.8        | 2.3        |       | 5.9        | 2.4        |       |
|                                                                | Marginally employed        | 4.4        | 5.7        | 7.7        |       | 6.0        | 6.3        |       |
|                                                                | Partial retirement         | 0.2        | 0.0        | 0.2        |       | 1.6        | 0.0        |       |
|                                                                | Voluntary service          | 0.0        | 0.0        | 0.0        |       | 0.0        | 0.0        |       |
|                                                                | Workshop for the disabled  | 0.4        | 0.2        | 0.0        |       | 0.8        | 0.0        |       |
|                                                                | Not employed (anymore)     | 42.7       | 44.3       | 33.6       |       | 42.5       | 36.9       |       |
| Unemployment phases in past 10 years [%] <sup>2</sup>          | Yes                        | 34.4       | 23.3       | 28.3       | .098  | 40.4       | 26.3       | .003  |
|                                                                | No                         | 65.6       | 76.7       | 71.7       |       | 59.6       | 73.7       |       |
| Body Mass Index (BMI) [M (SD)]                                 |                            | 26.4 (5.0) | 27.1 (5.2) | 26.1 (6.9) | .137  | 26.6 (8.2) | 25.9 (5.3) | .401  |
| Self-reported health state [%] <sup>2</sup>                    | Very good                  | 8.6        | 9.0        | 15.4       | <.001 | 10.8       | 13.2       | .003  |
|                                                                | Good                       | 35.0       | 37.1       | 42.0       |       | 30.5       | 40.6       |       |
|                                                                | Satisfactory               | 40.2       | 34.5       | 30.9       |       | 47.4       | 31.3       |       |
|                                                                | Not so good                | 12.7       | 15.8       | 9.9        |       | 9.9        | 12.3       |       |
|                                                                | Poor                       | 3.5        | 3.6        | 1.8        |       | 1.4        | 2.6        |       |
| Health insurance status [%] <sup>2</sup>                       | Statutory health insurance | 89.3       | 87.3       | 87.7       | .669  | 90.9       | 87.8       | .290  |
|                                                                | Private health insurance   | 10.7       | 12.7       | 12.3       |       | 9.1        | 12.2       |       |
| Risk preference [M (SD)] from 0 (avoidance) to 10 (preference) |                            | 4.8 (2.5)  | 4.4 (2.2)  | 4.4 (2.4)  | .089  | 4.1 (2.6)  | 4.5 (2.4)  | .050  |

1 Variance analyses and Chi<sup>2</sup>-tests, respectively

2 Subsamples were presented with the items

Table S4. Overview of domain-specific comparisons of respondents' error estimations and acceptance of algorithms and experts (u-Tests, adjusted alpha/(k-1 = .01); effect size is Cohen's *d*).

|                                                     | Estimated errors of algorithms over experts |          | Accepted errors of algorithms over experts |          |
|-----------------------------------------------------|---------------------------------------------|----------|--------------------------------------------|----------|
|                                                     | <i>d</i>                                    | <i>p</i> | <i>d</i>                                   | <i>p</i> |
| Mistakenly suitable applicant (false positive)      | -                                           | .013     | -0.01                                      | <.001    |
| Mistakenly unsuitable applicant (false negative)    | -0.11                                       | <.001    | -0.08                                      | <.001    |
| Mistakenly predicted recidivism (false positive)    | -                                           | .766     | -0.01                                      | <.001    |
| Mistakenly predicted no recidivism (false negative) | -                                           | .107     | -                                          | .017     |
| Mistakenly behaving healthily (false positive)      | -                                           | .119     | -                                          | .458     |
| Mistakenly behaving unhealthily (false negative)    | 0.09                                        | <.001    | -                                          | .019     |

Table S5. Characteristics of the household sample (unweighted data) and split according to the experimental manipulation (algorithm, expert).

| Characteristic                                                |                                            | All                  | Algorithm condition  | Expert condition     | Adult population Germany 2019 <sup>1</sup> |
|---------------------------------------------------------------|--------------------------------------------|----------------------|----------------------|----------------------|--------------------------------------------|
|                                                               |                                            | N=3,086              | n=1,574              | n=1,512              | 83 Million                                 |
| Gender [%]                                                    | Female                                     | 53.8                 | 53.9                 | 53.6                 | 51.1                                       |
|                                                               | Male                                       | 46.2                 | 46.1                 | 46.4                 | 48.9                                       |
| Age [M (SD), Median] in years                                 |                                            | 54.7 (18.6), 56      | 54.6 (19.0), 57      | 54.9 (18.2), 56      | 51.1                                       |
| Household net income [M (SD), Median] in EUR                  |                                            | 2,822 (1,806), 2,400 | 2,877 (1,848), 2,500 | 2,766 (1,761), 2,400 | 2175, 1960 <sup>2</sup>                    |
| Education Diplomas/degrees from secondary/tertiary school [%] | Sec. Gen. School Leaving Certificate       | 28.1                 | 27.8                 | 28.5                 | 28.6                                       |
|                                                               | Intermediate School Degree                 | 31.1                 | 30.8                 | 31.3                 | 23.5                                       |
|                                                               | Leaving Certificate From Voc High School   | 6.6                  | 6.5                  | 6.8                  | -                                          |
|                                                               | College Entrance Exam                      | 24.2                 | 25.0                 | 23.4                 | 33.5                                       |
|                                                               | Other                                      | 7.6                  | 7.4                  | 7.8                  | 6.7                                        |
|                                                               | Dropout, No School Certificate             | 1.5                  | 1.5                  | 1.5                  | 4.0                                        |
|                                                               | Currently In School                        | 0.8                  | 1.0                  | 0.7                  | 3.5                                        |
|                                                               | Vocational degree attained [%]             | 45.1                 | 44.9                 | 45.3                 | 47.1                                       |
|                                                               | Vocational School                          | 9.7                  | 9.2                  | 10.3                 | 9.3                                        |
|                                                               | Health Care School                         | 0.2                  | 0.1                  | 0.3                  | -                                          |
| Vocational degree attained [%]                                | Technical School                           | 6.0                  | 5.6                  | 6.4                  | -                                          |
|                                                               | Civil Servant Training                     | 2.7                  | 2.9                  | 2.6                  | -                                          |
|                                                               | Other Degree                               | 1.2                  | 1.3                  | 1.1                  | -                                          |
|                                                               | Completed Vocational Training/Education    | 2.1                  | 2.5                  | 1.8                  | -                                          |
|                                                               | Not applicable (e.g. college degree)       | 33.0                 | 33.6                 | 32.3                 | 43.6                                       |
|                                                               | Fachhochschule (Univ. of Applied Sciences) | 6.2                  | 5.8                  | 6.6                  | -                                          |
|                                                               | University, Technical College              | 10.0                 | 10.2                 | 9.8                  | 17.3                                       |
|                                                               | College Not In Germany                     | 0.3                  | 0.5                  | 0.2                  | -                                          |
|                                                               | Engineering, Technical School              | 1.4                  | 1.6                  | 1.2                  | -                                          |
|                                                               | University (East)                          | 2.1                  | 2.5                  | 1.8                  | -                                          |
| Completed college education [%]                               | Graduation, state doctorate                | 2.1                  | 2.2                  | 2.1                  | 1.2                                        |
|                                                               | Not applicable                             | 77.8                 | 77.3                 | 78.3                 | 81.5                                       |

|                                                                        |                            |                  |                  |                  |                   |
|------------------------------------------------------------------------|----------------------------|------------------|------------------|------------------|-------------------|
| Occupation status [%]                                                  | Full time employment       | 32.5             | 32.6             | 32.5             | 32.4              |
|                                                                        | Part-time employment       | 12.2             | 11.2             | 13.2             | 13.1              |
|                                                                        | Training/apprenticeship    | 1.7              | 1.8              | 1.6              | 1.6               |
|                                                                        | Marginally employed        | 5.5              | 5.7              | 5.3              | 5.8 <sup>3</sup>  |
|                                                                        | Partial retirement         | 0.2              | 0.2              | 0.1              | 0.3 <sup>4</sup>  |
|                                                                        | Voluntary service          | 0.2              | 0.1              | 0.2              | 0.1 <sup>5</sup>  |
|                                                                        | Workshop for the disabled  | 0.3              | 0.3              | 0.3              | 0.3 <sup>6</sup>  |
|                                                                        | Not employed (anymore)     | 47.5             | 48.1             | 46.9             | 46.5              |
| Unemployment phases in past 10 years [%]*                              | Yes                        | 24.8             | 25.0             | 24.7             | 20.9 <sup>7</sup> |
|                                                                        | No                         | 75.2             | 75.0             | 75.3             | 79.1              |
| Body Mass Index (BMI) [M (SD), Median]                                 |                            | 26.6 (6.6), 25.7 | 26.6 (6.8), 25.7 | 26.6 (6.5), 25.8 | -                 |
| Self-reported health state [%]*                                        | Very good                  | 9.5              | 9.9              | 9.1              | -                 |
|                                                                        | Good                       | 38.9             | 38.1             | 39.8             |                   |
|                                                                        | Satisfactory               | 33.4             | 33.9             | 32.9             |                   |
|                                                                        | Not so good                | 14.4             | 14.8             | 14.0             |                   |
|                                                                        | Poor                       | 3.7              | 3.3              | 4.2              |                   |
| Health insurance status [%]*                                           | Statutory health insurance | 87.0             | 87.0             | 87.0             | 89.3              |
|                                                                        | Private health insurance   | 13.0             | 13.0             | 13.0             | 10.7              |
| Risk preference [M (SD), Median] from 0 (avoidance) to 10 (preference) |                            | 4.3 (2.3), 4     | 4.3 (2.4), 4     | 4.2 (2.3), 4     | -                 |

\* Subsamples were presented with the items

<sup>1</sup> Data source (if not specified else): Federal Statistical Office Germany, Destatis.de

<sup>2</sup> Data source: Eurostat-Database, <https://ec.europa.eu/eurostat/de/>

<sup>3</sup> Data source: Federal Employment Agency

<sup>4</sup> Data source: German Pension Insurance

<sup>5</sup> Data source: Federal Office for Family and Civil Society Tasks

<sup>6</sup> Data source: Employer's Liability Insurance Association for Health Services and Welfare Care, Data from 2017

<sup>7</sup> Data from 2014

Table S6. Items

| Section        | Algorithm condition group                                                                                                                                                                                                                                                                                                                                                                                                                                                                                                                                                                                                                                                                                                                                                                                                                                                                                                                               | Expert condition group |
|----------------|---------------------------------------------------------------------------------------------------------------------------------------------------------------------------------------------------------------------------------------------------------------------------------------------------------------------------------------------------------------------------------------------------------------------------------------------------------------------------------------------------------------------------------------------------------------------------------------------------------------------------------------------------------------------------------------------------------------------------------------------------------------------------------------------------------------------------------------------------------------------------------------------------------------------------------------------------------|------------------------|
| Introduction   | <p>In the following, we would like to talk about the errors that can happen in the assessment of human behavior. It is important to know: every assessment, every test, can always make two kinds of errors!</p> <p>Take as an example the detectors or scanners in the security area at the airport, which check whether someone is carrying a weapon.</p> <p>Go through them, and then the detector beeps even though you are not carrying anything - then the detector has made an error - it has given a false alarm.</p> <p>The other errors the detector can make would be if a terrorist passes through and there is no beeping despite the weapon. Then the detector would have missed the weapon.</p> <p>These two types of errors - false alarm and miss - occur in every assessment, every test.</p>                                                                                                                                         |                        |
| Credit scoring | <p>You have probably heard of the Schufa. The Schufa estimates the solvency of all persons in Germany. This helps entrepreneurs and landlords to decide whether someone gets a mobile phone contract, an apartment or a loan, for example.</p> <p>Now please imagine a group of 100 people who are actually insolvent:<br/>How many of them do you think are mistakenly assessed by the Schufa as being solvent?<br/>_____person(s)</p> <p>What would be acceptable to you: At most, how many of these 100 people could be mistakenly assessed by the Schufa as being solvent?<br/>_____person(s)</p> <p>Now please imagine a group of 100 people who are actually solvent:<br/>How many of them do you think are mistakenly assessed by the Schufa as being insolvent?<br/>_____person(s)</p> <p>What would you find acceptable: At most, how many of these 100 people could be mistakenly assessed by the Schufa as insolvent?<br/>_____person(s)</p> |                        |

Suitability  
prediction

Employers in Germany obtain information about applicants from various sources in order to make a preliminary selection. There are computer programs that use certain criteria such as grades or work experience to assess whether an applicant is suitable and will be considered.

Now please imagine a group of 100 applicants who are actually unsuitable:  
How many of them do you think are mistakenly assessed as suitable by computer programs?  
\_\_\_\_\_ Applicants

What would you personally find acceptable: At most, how many of these 100 applicants could be mistakenly assessed as suitable by computer programs?  
\_\_\_\_\_ Applicants

Now please imagine a group of 100 applicants who are actually suitable:  
How many of them do you think are mistakenly assessed as unsuitable by computer programs?  
\_\_\_\_\_ Applicants

What would you personally find acceptable: At most, how many of these 100 applicants could be mistakenly assessed as unsuitable by computer programs?  
\_\_\_\_\_ Applicants

Employers in Germany obtain information about applicants from various sources in order to make a preliminary selection. An expert, e.g. a personnel manager, uses certain criteria such as grades or work experience to assess whether an applicant is suitable and will be considered.

Now please imagine a group of 100 applicants who are actually unsuitable:  
How many of them do you think are mistakenly assessed as suitable by a personnel manager?  
\_\_\_\_\_ Applicants

What would you personally find acceptable: At most, how many of these 100 applicants could be mistakenly assessed as suitable by a personnel manager?  
\_\_\_\_\_ Applicants

Now please imagine a group of 100 applicants who are actually suitable:  
How many of them do you think are mistakenly assessed as unsuitable by a personnel manager?  
\_\_\_\_\_ Applicants

What would you personally find acceptable: At most, how many of these 100 applicants could be mistakenly assessed as unsuitable by a personnel manager?  
\_\_\_\_\_ Applicants

Recidivism  
prediction

In the US judiciary, offenders are regularly reviewed for early release. The computer program COMPAS assesses whether an offender will recidivize and commit another crime within the next 2 years.

Now please imagine a group of 100 offenders who are actually at risk of recidivism:

How many of them do you think the computer program mistakenly assesses as not being at risk of recidivism?  
\_\_\_\_\_offenders

What would you personally find acceptable: At most, how many of these 100 offenders could be mistakenly assessed as not being at risk of recidivism due to the computer program?  
\_\_\_\_\_offenders

Now please imagine a group of 100 offenders who are actually not at risk of recidivism:

How many of them do you think the computer program mistakenly assesses as being at risk of recidivism?  
\_\_\_\_\_offenders

What would you personally find acceptable: At most, how many of these 100 offenders could be mistakenly assessed as being at risk of recidivism due to the computer program?  
\_\_\_\_\_offenders

In the US judiciary, offenders are regularly reviewed for early release. An expert, e.g. a legal expert, assesses whether an offender will recidivize and commit another crime within the next 2 years.

Now please imagine a group of 100 offenders who are actually at risk of recidivism:

How many of them do you think the legal expert mistakenly assesses as not being at risk of recidivism?  
\_\_\_\_\_offenders

What would you personally find acceptable: At most, how many of these 100 offenders could be mistakenly assessed as not being at risk of recidivism due to the legal expert?  
\_\_\_\_\_offenders

Now please imagine a group of 100 offenders who are actually not at risk of recidivism:

How many of them do you think the legal expert mistakenly assesses to be at risk of recidivism?  
\_\_\_\_\_offenders

What would you personally find acceptable: At most, how many of these 100 offenders could be mistakenly assessed as being at risk of recidivism due to the legal expert?  
\_\_\_\_\_offenders



Health  
behavior

Private health insurers in Germany can take into account the personal responsibility of their insured customers to decide how much they have to pay. A computer program can assess whether an insured person is behaving in a healthy manner.

Now please imagine a group of 100 insured people who actually behave in an unhealthy way:  
How many of them do you think are mistakenly assessed by a computer program as behaving in a healthy manner?  
\_\_\_\_\_ Insured

What would you personally find acceptable: a maximum of how many of these 100 insured persons could be mistakenly assessed by a computer program as behaving in a healthy manner?  
\_\_\_\_\_ Insured

Now please imagine a group of 100 insured people who actually behave in a healthy manner:  
How many of them do you think are mistakenly assessed by a computer program as behaving in an unhealthy manner?  
\_\_\_\_\_ Insured

What would you personally find acceptable: a maximum of how many of these 100 insured persons could be mistakenly assessed by a computer program as behaving in an unhealthy manner?  
\_\_\_\_\_ Insured

---

Private health insurers in Germany can take into account the personal responsibility of their insured customers to decide how much they have to pay. An expert, e.g. a doctor, can assess whether an insured person is behaving in a healthy manner.

Now please imagine a group of 100 insured people who actually behave in an unhealthy way:  
How many of them do you think are mistakenly assessed by a doctor as behaving in a healthy manner?  
\_\_\_\_\_ Insured

What would you personally find acceptable: a maximum of how many of these 100 insured persons could be mistakenly assessed by a doctor as behaving in a healthy manner?  
\_\_\_\_\_ Insured

Now please imagine a group of 100 insured people who are actually behave in a healthy manner:  
How many of them do you think are mistakenly assessed by a doctor as behaving in an unhealthy manner?  
\_\_\_\_\_ Insured

What would you personally find acceptable: a maximum of how many of these 100 insured persons could be mistakenly assessed by a doctor as behaving in an unhealthy manner?  
\_\_\_\_\_ Insured

Table S7. Distribution of characteristics according to estimation (respondents grouped by quantiles) and acceptance of algorithm errors in predicting suitability of an applicant (presented as accuracy; grouped around AUC = .90, distinguishing highly critical respondents and less critical respondents along a lay-comprehensible border [1 error per 10 assignments]).

| Suitability prediction of applicants                          |                                      | Quantile <sub>33</sub> : Est.<br>AUC ≤ .700 | Quantile <sub>67</sub> -<br>Quantile <sub>33</sub> :<br>Est. AUC ≤<br>.875 | Quantile <sub>100</sub> -<br>Quantile <sub>67</sub> :<br>Est. AUC ><br>.875 | $p^1$ | Accepting<br>AUC<.90 | Accepting<br>AUC≥.90 | $p^1$ |
|---------------------------------------------------------------|--------------------------------------|---------------------------------------------|----------------------------------------------------------------------------|-----------------------------------------------------------------------------|-------|----------------------|----------------------|-------|
| Characteristic                                                |                                      | n=472                                       | n=420                                                                      | n=404                                                                       |       | n=212                | n=1,097              |       |
| Gender [%]                                                    | Female                               | 52.0                                        | 53.2                                                                       | 50.2                                                                        | .692  | 50.2                 | 53.1                 | .453  |
|                                                               | Male                                 | 48.0                                        | 46.8                                                                       | 49.8                                                                        |       | 49.8                 | 46.9                 |       |
| Age [M (SD)] in years                                         |                                      | 49.1 (17.9)                                 | 49.3 (17.9)                                                                | 48.0 (18.7)                                                                 | .549  | 47.8 (18.9)          | 49.3 (18.0)          | .260  |
| Household net income [M (SD)] in EUR                          |                                      | 2,835 (1,641)                               | 3,176 (1,900)                                                              | 3,038 (1,882)                                                               | .086  | 2,501 (1,330)        | 3,105 (1,872)        | <.001 |
| Education Diplomas/degrees from secondary/tertiary school [%] | Sec. Gen. School Leaving Certificate | 25.3                                        | 16.2                                                                       | 20.0                                                                        | .025  | 23.3                 | 20.2                 | <.001 |
|                                                               | Intermediate School Degree           | 32.3                                        | 28.5                                                                       | 25.8                                                                        |       | 31.7                 | 28.5                 |       |
|                                                               | Leaving Certificate From Voc HS      | 5.9                                         | 9.1                                                                        | 7.6                                                                         |       | 6.6                  | 7.6                  |       |
|                                                               | College Entrance Exam                | 24.9                                        | 29.4                                                                       | 31.8                                                                        |       | 17.2                 | 30.4                 |       |
|                                                               | Other                                | 8.9                                         | 12.4                                                                       | 10.9                                                                        |       | 13.0                 | 10.6                 |       |
|                                                               | Dropout, No School Certificate       | 1.7                                         | 2.5                                                                        | 2.1                                                                         |       | 6.2                  | 1.3                  |       |
|                                                               | Currently In School                  | 1.1                                         | 1.9                                                                        | 1.8                                                                         |       | 2.0                  | 1.4                  |       |
|                                                               | Apprenticeship                       | 40.6                                        | 34.4                                                                       | 40.5                                                                        |       | 34.0                 | 39.5                 |       |
|                                                               | Vocational School                    | 9.7                                         | 8.1                                                                        | 8.2                                                                         |       | 10.3                 | 8.9                  |       |
|                                                               | Health Care School                   | 0.1                                         | 0.0                                                                        | 0.0                                                                         |       | 0.1                  | 0.0                  |       |
| Vocational degree attained [%]                                | Technical School                     | 4.1                                         | 8.3                                                                        | 3.4                                                                         | .022  | 0.0                  | 4.9                  | .131  |
|                                                               | Civil Servant Training               | 1.6                                         | 3.5                                                                        | 1.1                                                                         |       | 1.2                  | 2.2                  |       |
|                                                               | Other Degree                         | 0.6                                         | 2.2                                                                        | 1.9                                                                         |       | 2.5                  | 1.3                  |       |
|                                                               | Completed Voc. Training/Education    | 4.3                                         | 3.1                                                                        | 4.9                                                                         |       | 7.7                  | 3.4                  |       |
|                                                               | Not applicable (e.g. college degree) | 39.0                                        | 40.3                                                                       | 40.1                                                                        |       | 38.9                 | 39.8                 |       |
|                                                               | FH (Univ. of Applied Sciences)       | 5.3                                         | 10.0                                                                       | 4.7                                                                         |       | 7.1                  | 6.6                  |       |
|                                                               | University, Technical College        | 11.4                                        | 12.0                                                                       | 12.4                                                                        |       | 11.0                 | 12.2                 |       |
|                                                               | College Not In Germany               | 0.0                                         | 0.1                                                                        | 0.5                                                                         |       | 0.0                  | 0.2                  |       |
|                                                               | Engineering, Technical School        | 1.3                                         | 2.0                                                                        | 1.1                                                                         |       | 0.4                  | 1.6                  |       |
|                                                               | University (East)                    | 1.4                                         | 1.8                                                                        | 1.4                                                                         |       | 0.8                  | 1.7                  |       |
| Completed college education [%]                               | Graduation, state doctorate          | 3.4                                         | 4.9                                                                        | 1.7                                                                         | .016  | 2.0                  | 3.7                  | .479  |
|                                                               | Not applicable                       | 77.2                                        | 69.3                                                                       | 78.1                                                                        |       | 78.8                 | 73.9                 |       |
|                                                               |                                      |                                             |                                                                            |                                                                             |       |                      |                      |       |

|                                                                |                            |            |            |            |      |             |            |      |
|----------------------------------------------------------------|----------------------------|------------|------------|------------|------|-------------|------------|------|
| Occupation status [%]                                          | Full time employment       | 39.0       | 41.8       | 41.7       | .430 | 35.4        | 41.0       | .029 |
|                                                                | Part-time employment       | 14.3       | 11.5       | 12.1       |      | 11.3        | 13.7       |      |
|                                                                | Training/apprenticeship    | 3.8        | 2.4        | 2.2        |      | 6.1         | 2.2        |      |
|                                                                | Marginally employed        | 4.6        | 7.8        | 6.1        |      | 5.6         | 6.4        |      |
|                                                                | Partial retirement         | 0.1        | 0.0        | 0.5        |      | 0.0         | 0.2        |      |
|                                                                | Voluntary service          | 0.0        | 0.0        | 0.0        |      | 0.0         | 0.0        |      |
|                                                                | Workshop for the disabled  | 0.2        | 0.0        | 0.1        |      | 0.0         | 0.1        |      |
|                                                                | Not employed (anymore)     | 37.9       | 36.6       | 37.3       |      | 41.6        | 36.3       |      |
| Unemployment phases in past 10 years [%] <sup>2</sup>          | Yes                        | 32.3       | 29.5       | 23.1       | .044 | 39.0        | 26.5       | .004 |
|                                                                | No                         | 67.7       | 70.5       | 76.9       |      | 61.0        | 73.5       |      |
| Body Mass Index (BMI) [M (SD)]                                 |                            | 26.6 (8.2) | 26.3 (4.8) | 25.7 (4.8) | .110 | 26.3 (10.7) | 26.2 (5.0) | .786 |
| Self-reported health state [%] <sup>2</sup>                    | Very good                  | 8.8        | 10.2       | 18.4       | .001 | 10.7        | 12.8       | .002 |
|                                                                | Good                       | 39.0       | 42.4       | 38.6       |      | 33.7        | 41.2       |      |
|                                                                | Satisfactory               | 38.2       | 31.5       | 31.2       |      | 44.7        | 31.1       |      |
|                                                                | Not so good                | 11.2       | 13.5       | 10.1       |      | 10.3        | 12.1       |      |
|                                                                | Poor                       | 2.8        | 2.5        | 1.8        |      | 0.6         | 2.8        |      |
| Health insurance status [%] <sup>2</sup>                       | Statutory health insurance | 89.1       | 86.9       | 88.7       | .539 | 94.9        | 87.0       | .001 |
|                                                                | Private health insurance   | 10.9       | 13.1       | 11.3       |      | 5.1         | 13.0       |      |
| Risk preference [M (SD)] from 0 (avoidance) to 10 (preference) |                            | 4.6 (2.5)  | 4.4 (2.4)  | 4.5 (2.4)  | .449 | 4.6 (2.7)   | 4.4 (2.4)  | .486 |

1 Variance analyses and Chi<sup>2</sup>-tests, respectively

2 Subsamples were presented with the items

Table S8. Distribution of characteristics according to estimation (respondents grouped by quantiles) and acceptance of algorithm errors in predicting healthy behavior (presented as accuracy; grouped around AUC = .90, distinguishing highly critical respondents and less critical respondents along a lay-comprehensible border [1 error per 10 assignments]).

| Suitability prediction of applicants                          |                                | Quantile <sub>33</sub> :<br>Estimating<br>AUC ≤ .725 | Quantile <sub>67</sub> -<br>Quantile <sub>33</sub> :<br>Estimating<br>AUC ≤ .900 | Quantile <sub>100</sub> -<br>Quantile <sub>67</sub> :<br>Estimating<br>AUC > .900 | <i>p</i> <sup>1</sup> | Accepting<br>AUC < .90 | Accepting<br>AUC ≥ .90 | <i>p</i> <sup>1</sup> |
|---------------------------------------------------------------|--------------------------------|------------------------------------------------------|----------------------------------------------------------------------------------|-----------------------------------------------------------------------------------|-----------------------|------------------------|------------------------|-----------------------|
| Characteristic                                                |                                | n=431                                                | n=543                                                                            | n=289                                                                             |                       | n=190                  | n=1,086                |                       |
| Gender [%]                                                    | Female                         | 51.4                                                 | 50.7                                                                             | 53.1                                                                              | .819                  | 49.7                   | 52.0                   | .583                  |
|                                                               | Male                           | 48.6                                                 | 49.3                                                                             | 46.9                                                                              |                       | 50.3                   | 48.0                   |                       |
| Age [M (SD)] in years                                         |                                | 50.0 (18.2)                                          | 48.7 (18.3)                                                                      | 46.4 (18.0)                                                                       | .030                  | 48.2 (19.2)            | 49.0 (18.1)            | .562                  |
| Household net income [M (SD)] in EUR                          |                                | 2,854 (1,642)                                        | 2,940 (1,730)                                                                    | 3,491 (2,159)                                                                     | .001                  | 2,848 (1,803)          | 3,059 (1,817)          | .230                  |
| Education Diplomas/degrees from secondary/tertiary school [%] | Sec. Gen. School Leaving Cert. | 24.2                                                 | 20.6                                                                             | 13.9                                                                              | <.001                 | 23.2                   | 19.9                   | <.001                 |
|                                                               | Intermediate School Degree     | 33.2                                                 | 28.0                                                                             | 23.8                                                                              |                       | 31.9                   | 28.4                   |                       |
|                                                               | Leaving Cert. From Voc HS      | 6.9                                                  | 9.2                                                                              | 6.8                                                                               |                       | 7.1                    | 7.9                    |                       |
|                                                               | College Entrance Exam          | 22.0                                                 | 29.7                                                                             | 36.8                                                                              |                       | 19.4                   | 30.2                   |                       |
|                                                               | Other                          | 9.4                                                  | 8.2                                                                              | 17.6                                                                              |                       | 9.2                    | 11.0                   |                       |
|                                                               | Dropout, No School Certificate | 2.9                                                  | 2.3                                                                              | 0.0                                                                               |                       | 6.1                    | 1.2                    |                       |
|                                                               | Currently In School            | 1.4                                                  | 2.0                                                                              | 1.1                                                                               |                       | 3.0                    | 1.3                    |                       |
| Vocational degree attained [%]                                | Apprenticeship                 | 39.6                                                 | 36.5                                                                             | 40.0                                                                              | .126                  | 36.1                   | 39.1                   | .062                  |
|                                                               | Vocational School              | 10.7                                                 | 9.0                                                                              | 5.8                                                                               |                       | 7.8                    | 9.1                    |                       |
|                                                               | Health Care School             | 0.0                                                  | 0.0                                                                              | 0.0                                                                               |                       | 0.0                    | 0.0                    |                       |
|                                                               | Technical School               | 5.1                                                  | 6.0                                                                              | 5.3                                                                               |                       | 7.0                    | 5.2                    |                       |
|                                                               | Civil Servant Training         | 1.7                                                  | 2.7                                                                              | 2.1                                                                               |                       | 1.4                    | 2.3                    |                       |
|                                                               | Other Degree                   | 1.8                                                  | 1.7                                                                              | 0.8                                                                               |                       | 2.4                    | 1.4                    |                       |
|                                                               | Completed Voc. Training/Edu.   | 5.5                                                  | 4.7                                                                              | 1.6                                                                               |                       | 8.0                    | 3.4                    |                       |
| Completed college education [%]                               | NA (e.g. college degree)       | 35.6                                                 | 39.5                                                                             | 44.3                                                                              | .129                  | 37.3                   | 39.4                   | .217                  |
|                                                               | FH (Univ. of Applied Sciences) | 4.9                                                  | 8.0                                                                              | 7.2                                                                               |                       | 6.5                    | 6.7                    |                       |
|                                                               | University, Technical College  | 13.1                                                 | 9.3                                                                              | 14.4                                                                              |                       | 7.5                    | 12.6                   |                       |
|                                                               | College Not In Germany         | 0.1                                                  | 0.3                                                                              | 0.0                                                                               |                       | 0.8                    | 0.1                    |                       |
|                                                               | Engineering, Technical School  | 1.5                                                  | 1.9                                                                              | 0.2                                                                               |                       | 0.9                    | 1.4                    |                       |
|                                                               | University (East)              | 1.6                                                  | 1.1                                                                              | 2.3                                                                               |                       | 0.7                    | 1.6                    |                       |
| Graduation, state doctorate                                   |                                | 2.8                                                  | 3.3                                                                              | 4.3                                                                               |                       | 2.5                    | 3.5                    |                       |

|                                                                |                            |            |            |            |      |            |            |      |
|----------------------------------------------------------------|----------------------------|------------|------------|------------|------|------------|------------|------|
| Occupation status [%]                                          | Not applicable             | 76.0       | 76.1       | 71.6       | .177 | 81.0       | 74.1       | .108 |
|                                                                | Full time employment       | 37.4       | 42.5       | 43.3       |      | 33.4       | 41.4       |      |
|                                                                | Part-time employment       | 13.8       | 11.1       | 14.9       |      | 12.1       | 13.2       |      |
|                                                                | Training/apprenticeship    | 3.2        | 3.5        | 1.0        |      | 5.2        | 2.4        |      |
|                                                                | Marginally employed        | 5.3        | 6.8        | 6.6        |      | 5.8        | 6.5        |      |
|                                                                | Partial retirement         | 0.0        | 0.5        | 0.0        |      | 0.0        | 0.2        |      |
|                                                                | Voluntary service          | 0.0        | 0.0        | 0.0        |      | 0.0        | 0.0        |      |
|                                                                | Workshop for the disabled  | 0.3        | 0.1        | 0.0        |      | 0.1        | 0.1        |      |
| Unemployment phases in past 10 years [%] <sup>2</sup>          | Not employed (anymore)     | 40.0       | 35.6       | 34.4       | .050 | 43.5       | 36.1       | .006 |
|                                                                | Yes                        | 31.3       | 23.1       | 29.3       |      | 38.0       | 25.7       |      |
|                                                                | No                         | 68.7       | 76.9       | 70.7       |      | 62.0       | 74.3       |      |
| Body Mass Index (BMI) [M (SD)]                                 |                            | 26.3 (5.0) | 26.5 (7.6) | 25.7 (4.9) | .226 | 25.4 (5.1) | 26.4 (6.4) | .035 |
| Self-reported health state [%] <sup>2</sup>                    | Very good                  | 9.0        | 12.8       | 18.2       | .024 | 11.0       | 12.9       | .042 |
|                                                                | Good                       | 39.8       | 41.4       | 39.7       |      | 34.8       | 41.2       |      |
|                                                                | Satisfactory               | 35.8       | 31.3       | 31.5       |      | 42.7       | 31.1       |      |
|                                                                | Not so good                | 12.4       | 11.9       | 9.8        |      | 9.8        | 12.2       |      |
|                                                                | Poor                       | 3.0        | 2.7        | 0.9        |      | 1.7        | 2.6        |      |
| Health insurance status [%] <sup>2</sup>                       | Statutory health insurance | 90.0       | 87.6       | 86.4       | .323 | 90.2       | 87.9       | .465 |
|                                                                | Private health insurance   | 10.0       | 12.4       | 13.6       |      | 9.8        | 12.1       |      |
| Risk preference [M (SD)] from 0 (avoidance) to 10 (preference) |                            | 4.6 (2.5)  | 4.4 (2.4)  | 4.4 (2.4)  | .569 | 4.5 (2.6)  | 4.5 (2.4)  | .962 |

1 Variance analyses and Chi<sup>2</sup>-tests, respectively

2 Subsamples were presented with the items
